# Supplementary material for: IL-6 Responsiveness of CD4+ and CD8+ T Cells after Allogeneic Stem Cell Transplantation Differs between Patients and Is Associated with Previous Acute Graft versus Host Disease and Pretransplant Antithymocyte Globulin Therapy
Source: MDPI journal article supplement (doi:10.3390/jcm11092530), 2022-04-30
Supplement: s1 [file s1]

## SUPPLEMENTARY INFORMATION

### **IL-6 RESPONSIVENESS OF CD4<sup>+</sup> AND CD8<sup>+</sup> T CELLS AFTER ALLOGENEIC STEM CELL TRANSPLANTATION DIFFERS BETWEEN PATIENTS AND IS ASSOCIATED WITH PREVIOUS ACUTE GRAFT-VERSUS-HOST DISEASE AND PRETRANSPLANT ANTITHYMOCYTE GLOBULIN THERAPY**

Tor Henrik Anderson Tvedt<sup>1,2,3</sup>, Stephan Rose-John<sup>4</sup>, Galina Tsykunova<sup>2</sup>, Aymen Bushra Ahmed<sup>2</sup>, Tobias Gedde-Dahl<sup>1,6</sup>, Elisabeth Ersvær<sup>6</sup> and Øystein Bruserud<sup>2,3</sup>

<sup>1</sup> Department of Hematology, University of Oslo, 0424 Oslo, Norway.

<sup>2</sup> Section for Hematology, Department of Medicine, Haukeland University Hospital, Bergen, Norway.

<sup>3</sup> Section for Hematology, Institute of Clinical Science, University of Bergen, Bergen, Norway.

<sup>4</sup> Institute of Biochemistry, Kiel University, Olshausenstrasse 40, Kiel, Germany.

<sup>5</sup> Institute of Clinical Medicine, University of Oslo, Oslo, Norway

<sup>6</sup> Department of Biomedical Laboratory Scientist Education, Western Norway University of Applied Sciences, Bergen, Norway.

**Supplementary Table S1. Intracellular signaling in CD3<sup>+</sup> mononuclear cells; a comparison of patients with and without previous acute GVHD.** The table shows the effects of four forms of IL-6 stimulation on the phosphorylation of the intracellular mediators Akt(Thr308), mTOR(Ser2448), STAT3(Ser727) and STAT3(Tyr705) in CD3<sup>+</sup> circulating mononuclear cells. All p-values refer to a statistical comparison between cultures with and without IL-6 activation signals; the corresponding control cultures thus contained PMA alone or PMA+anti-CD3+anti-CD28. The table shows the combinations with increased mediator phosphorylation corresponding to p<0.05. All comparisons were done using the Wilcoxon Signed Rank Test.

| Phosphotarget                      | H-IL-6 | IL-6 | IL-6<br>sIL-6R | IL-6<br>sIL-6R<br>sgp130FC |
|------------------------------------|--------|------|----------------|----------------------------|
| <b>All patients</b>                |        |      |                |                            |
| AKT(Thr308)                        |        |      |                |                            |
| mTOR(Ser2448)                      |        |      |                | 0.02                       |
| STAT3(Ser727)                      |        |      |                |                            |
| STAT3(Tyr705)                      | 0.005  |      |                | 0.04                       |
| <b>Patients with acute GVHD</b>    |        |      |                |                            |
| AKT(Thr308)                        |        |      |                |                            |
| mTOR(Ser2448)                      |        |      |                |                            |
| STAT3(Ser727)                      |        |      |                |                            |
| STAT3(Tyr705)                      | 0.02   |      | 0.04           |                            |
| <b>Patients without acute GVHD</b> |        |      |                |                            |
| AKT(Thr308)                        |        |      |                |                            |
| mTOR(Ser2448)                      |        |      |                |                            |
| STAT3(Ser727)                      |        |      |                |                            |
| STAT3(Tyr705)                      |        |      |                |                            |

**Supplementary Table S2. The effects of IL-6 stimulation on circulating CD3<sup>+</sup>CD4<sup>+</sup> and CD3<sup>+</sup>CD8<sup>+</sup> T cells derived from patients with and without ATG as a part of their pretransplant GVHD prophylaxis.** The effects of four different forms of IL-6 stimulation on the phosphorylation of Akt(Thr308), mTOR(Ser2448), STAT3(Ser727) and STAT3(Tyr705) were investigated. All p-values refer to a statistical comparison between cultures with and without IL-6 activation signals; the corresponding control cultures thus contained medium alone or anti-CD3+anti-CD28. The table shows the combinations with increased mediator phosphorylation corresponding to p<0.05.

| Phosphotarget                                                                | Without TCR ligation |       |                |                            | With TCR ligation |        |               |                          |
|------------------------------------------------------------------------------|----------------------|-------|----------------|----------------------------|-------------------|--------|---------------|--------------------------|
|                                                                              | H-IL-6               | IL-6  | IL-6<br>sIL-6R | IL-6<br>sIL-6R<br>sgp130FC | H-IL-6            | IL-6   | IL6<br>sIL-6R | IL-6<br>sIL-6R<br>sgp130 |
| <b>CD3<sup>+</sup>CD4<sup>+</sup> T cells; patients treated with ATG</b>     |                      |       |                |                            |                   |        |               |                          |
| <b>AKT(Thr308)</b>                                                           |                      |       |                |                            |                   |        |               |                          |
| <b>mTOR(Ser2448)</b>                                                         |                      |       |                |                            |                   |        |               | 0.04                     |
| <b>STAT3(Ser727)</b>                                                         | 0.01                 | 0.04  |                |                            |                   |        |               |                          |
| <b>STAT3(Tyr705)</b>                                                         | 0.002                | 0.007 | 0.007          | 0.004                      | <0.001            | <0.001 | <0.001        | 0.02                     |
| <b>CD3<sup>+</sup>CD4<sup>+</sup> T cells; patients not treated with ATG</b> |                      |       |                |                            |                   |        |               |                          |
| <b>AKT(Thr308)</b>                                                           |                      |       |                |                            |                   |        |               |                          |
| <b>mTOR(Ser2448)</b>                                                         |                      |       |                |                            |                   |        |               | 0.02                     |
| <b>STAT3(Ser727)</b>                                                         |                      |       |                |                            | 0.01              |        | 0.01          |                          |
| <b>STAT3(Tyr705)</b>                                                         | <0.001               | 0.005 | 0.001          | 0.003                      | <0.001            | <0.001 | <0.001        | <0.001                   |
| <b>CD3<sup>+</sup>CD8<sup>+</sup> T cells; patients treated with ATG</b>     |                      |       |                |                            |                   |        |               |                          |
| <b>AKT(Thr308)</b>                                                           |                      |       |                |                            |                   | 0.02   |               |                          |
| <b>mTOR(Ser2448)</b>                                                         |                      |       |                |                            |                   |        |               |                          |
| <b>STAT3(Ser727)</b>                                                         | 0.01                 | 0.02  |                |                            |                   |        |               |                          |
| <b>STAT3(Tyr705)</b>                                                         | 0.002                |       |                |                            | 0.01              |        |               |                          |
| <b>CD3<sup>+</sup>CD8<sup>+</sup> T cells, patients not treated with ATG</b> |                      |       |                |                            |                   |        |               |                          |
| <b>AKT(Thr308)</b>                                                           |                      |       |                |                            |                   |        |               |                          |
| <b>mTOR(Ser2448)</b>                                                         |                      |       |                |                            |                   |        | <0.001        | 0.003                    |
| <b>STAT3(Ser727)</b>                                                         |                      |       |                |                            | 0.02              | 0.03   |               |                          |
| <b>STAT3(Tyr705)</b>                                                         |                      |       |                |                            | <0.01             |        |               |                          |

**Supplementary Table S3. The effects of PMA stimulation on T cell subsets.** The table shows the effects of PMA alone and PMA+anti-CD3+anti-CD28 on the phosphorylation of STAT3/Akt/mTOR in circulating CD3<sup>+</sup>CD4<sup>+</sup> T cells, CD3<sup>+</sup>CD8<sup>+</sup> T cells and CD3<sup>-</sup> mononuclear cells derived from allotransplant recipients treated with ATG or not treated with ATG. All p-values refer to a statistical comparison between cultures with and without PMA activation signals; the corresponding control cultures were prepared in medium alone. The table shows the stimulations with increased mediator phosphorylation corresponding to p<0.05. All comparisons were done using the Wilcoxon Signed Rank Test.

|                               | CD3 <sup>+</sup> CD4 <sup>+</sup> |                        | CD3 <sup>+</sup> CD8 <sup>+</sup> |                        | CD3 <sup>-</sup> |
|-------------------------------|-----------------------------------|------------------------|-----------------------------------|------------------------|------------------|
| Phosphotarget                 | PMA alone                         | PMA anti-CD3 anti-CD28 | PMA alone                         | PMA anti-CD3 anti-CD28 | PMA alone        |
| Patients treated with ATG     |                                   |                        |                                   |                        |                  |
| AKT(Thr308)                   |                                   | 0.01                   | 0.002                             | 0.001                  | 0.04             |
| mTOR(Ser2448)                 | 0.002                             | 0.01                   | <0.0001                           | 0.01                   | <0.001           |
| STAT3(Ser727)                 | 0.01                              |                        | 0.001                             |                        | 0.005            |
| STAT3(Tyr705)                 | 0.004                             |                        |                                   |                        |                  |
| Patients not treated with ATG |                                   |                        |                                   |                        |                  |
| AKT(Thr308)                   | <0.001                            | 0.001                  | 0.002                             | <0.001                 | 0.03             |
| mTOR(Ser2448)                 | <0.001                            | <0.001                 | <0.001                            | <0.001                 | <0.001           |
| STAT3(Ser727)                 | <0.001                            | 0.002                  | 0.005                             | 0.002                  | 0.02             |
| STAT3(Tyr705)                 |                                   | .                      |                                   |                        |                  |

**Supplementary Table S4. Effects of IL-6 stimulation on intracellular signaling in CD3<sup>+</sup> mononuclear cells; a comparison of patients with and without previous ATG therapy.** The effects of four forms of IL-6 stimulation on the phosphorylation of the intracellular mediators Akt(Thr308), mTOR(Ser2448), STAT3(Ser727) and STAT3(Tyr705) in CD3<sup>+</sup> circulating mononuclear cells were investigated. All p-values refer to a statistical comparison between cultures with and without IL-6 activation signals; the corresponding control cultures thus contained medium alone or anti-CD3+anti-CD28. The table shows the combinations with increased mediator phosphorylation corresponding to p<0.05. All comparisons were done using the Wilcoxon Signed Rank Test.

| Phosphotarget                        | H-IL-6 | IL-6 | IL-6<br>sIL-6R | IL-6<br>sIL-6R<br>sgp130 |
|--------------------------------------|--------|------|----------------|--------------------------|
| <b>Patients treated with ATG</b>     |        |      |                |                          |
| AKT(Thr308)                          |        |      |                |                          |
| mTOR(Ser2448)                        |        |      |                | 0.03                     |
| STAT3(Ser727)                        |        |      |                |                          |
| STAT3(Y705)                          | 0.007  |      |                |                          |
| <b>Patients not treated with ATG</b> |        |      |                |                          |
| AKT(Thr308)                          |        |      |                |                          |
| mTOR(Ser2448)                        |        |      |                |                          |
| STAT3(Ser727)                        |        |      |                |                          |
| STAT3(Y705)                          |        |      |                |                          |
